# Supplementary material
Source: MDPI journal article supplement (https://www.mdpi.com/search?q=materials-11-01842)
Supplement: s001 [file materials-11-01842-s001.pdf]

**Synergistic effects and mechanism of modified silica sol flame retardant systems on silk fabric**

Chun Liu, Tieling Xing\*, Bingju Wei, Guoqiang Chen

National Engineering Laboratory for Modern Silk, College of Textile and

Clothing Engineering, Soochow University, Suzhou 215123, China

\* Correspondence: [xingtieling@suda.edu.cn](mailto:xingtieling@suda.edu.cn); Tel.: 86-512-67061152

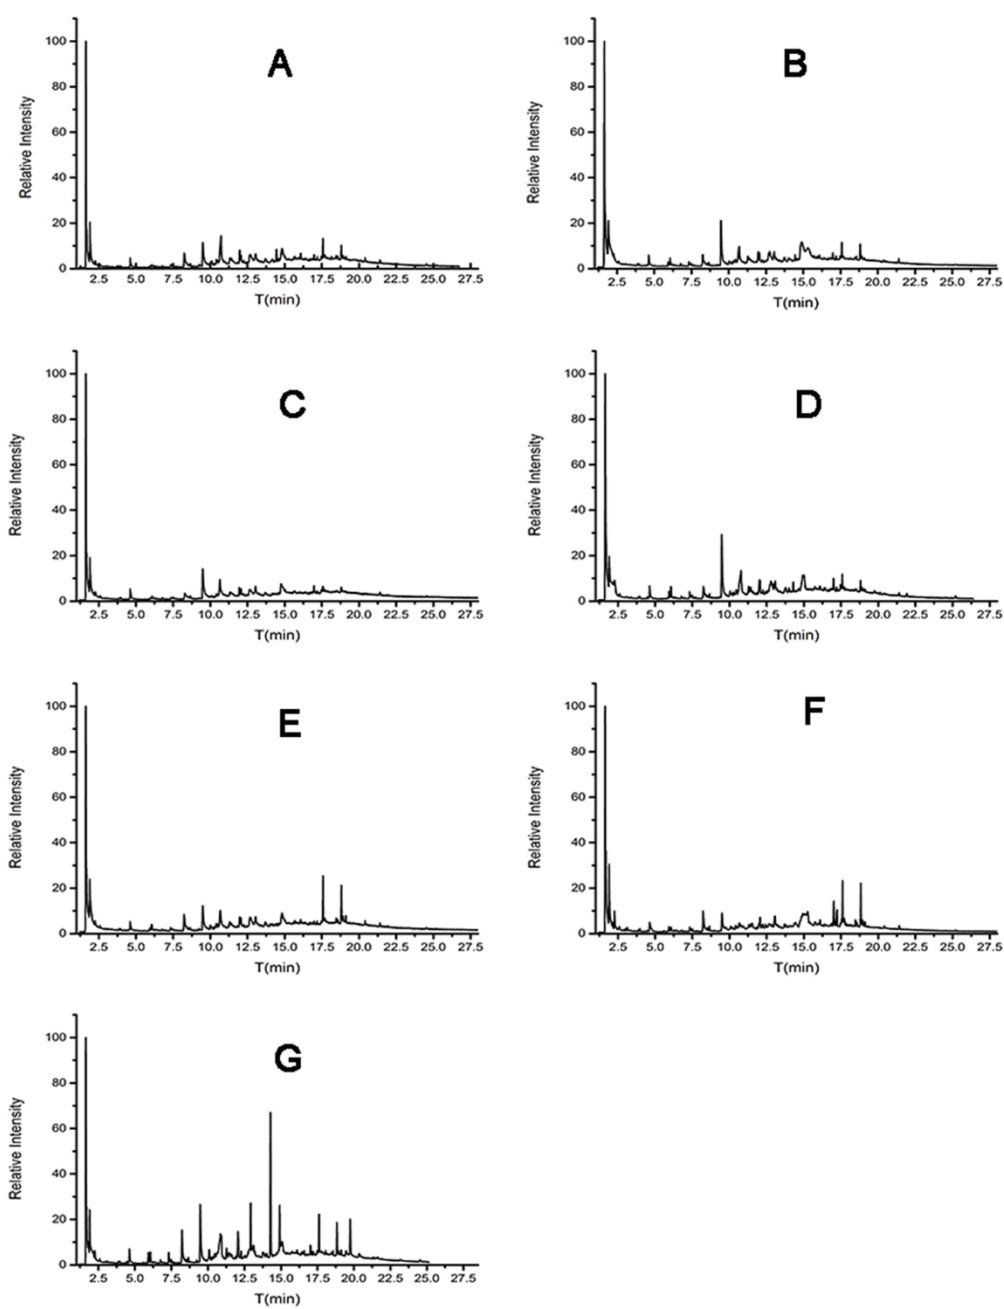

**Figure S1.** The Pyrolysis gas chromatography of the original silk and finished silk (Si-B, Si-N<sub>1</sub> and Si-N<sub>2</sub>, Si-N<sub>3</sub>, Si-P<sub>1</sub> and Si-P<sub>2</sub>).

**Table S1.** Name, code and chemical structures of sol-gel precursor and synergist agents.

| Name                                     | Code           | Chemical Structure                                                                   |
|------------------------------------------|----------------|--------------------------------------------------------------------------------------|
| Tetraethyl orthosilicate                 | Si             | 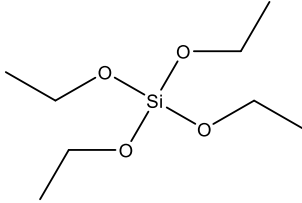   |
| Boric acid                               | B.             |    |
| Urea                                     | N <sub>1</sub> |   |
| Dicyandiamide                            | N <sub>2</sub> |  |
| Melamine cyanurate                       | N <sub>3</sub> |  |
| 1-hydroxyethane<br>1,1-diphosphonic acid | P <sub>1</sub> |  |

6H-dibenz(C,E)(1,2)oxap  
hosphorin-6-oxide

P<sub>2</sub>

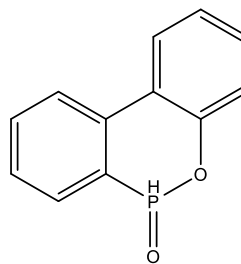

**Table S2.** Total dry solids add-on of sols on silk samples.

| Sample              | Add-on (wt.-%) | Sample              | Add-on (wt.-%) |
|---------------------|----------------|---------------------|----------------|
| Silk                | -              | Silk-P <sub>2</sub> | 33.04 ± 0.22   |
| Silk-Si             | 27.44 ± 0.24   | Si-B                | 19.72 ± 0.18   |
| Silk-B              | 13.03 ± 0.16   | Si-N <sub>1</sub>   | 10.98 ± 0.11   |
| Silk-N <sub>1</sub> | 2.71 ± 0.09    | Si-N <sub>2</sub>   | 22.09 ± 0.20   |
| Silk-N <sub>2</sub> | 7.70 ± 0.23    | Si-N <sub>3</sub>   | 28.11 ± 0.15   |
| Silk-N <sub>3</sub> | 4.86 ± 0.12    | Si-P <sub>1</sub>   | 26.62 ± 0.23   |
| Silk-P <sub>1</sub> | 23.01 ± 0.26   | Si-P <sub>2</sub>   | 33.71 ± 0.19   |

**Table S3.** The pyrolysis gas chromatography of Silk.

| No. | Time<br>(min) | Compound<br>Name                 | Area<br>(%) | No. | Time<br>(min) | Compound<br>Name                                             | Area<br>(%) |
|-----|---------------|----------------------------------|-------------|-----|---------------|--------------------------------------------------------------|-------------|
| 1   | 1.634         | CO <sub>2</sub>                  | 26.70       | 12  | 10.715        | C <sub>4</sub> H <sub>4</sub> N <sub>2</sub> O <sub>2</sub>  | 10.53       |
| 2   | 1.686         | CHN                              | 10.25       | 13  | 11.972        | C <sub>7</sub> H <sub>13</sub> NO <sub>2</sub>               | 2.69        |
| 3   | 1.9           | C <sub>2</sub> H <sub>3</sub> N  | 9.20        | 14  | 12.065        | C <sub>8</sub> H <sub>7</sub> N                              | 1.42        |
| 4   | 2.263         | C <sub>3</sub> H <sub>5</sub> N  | 0.56        | 15  | 12.668        | C <sub>9</sub> H <sub>13</sub> N <sub>3</sub> O <sub>4</sub> | 5.35        |
| 5   | 2.589         | C <sub>4</sub> H <sub>7</sub> N  | 0.27        | 16  | 13.043        | C <sub>8</sub> H <sub>10</sub> O <sub>2</sub>                | 2.26        |
| 6   | 3.868         | C <sub>5</sub> H <sub>9</sub> N  | 0.17        | 17  | 14.446        | C <sub>12</sub> H <sub>24</sub> O <sub>2</sub>               | 1.31        |
| 7   | 3.976         | C <sub>5</sub> H <sub>9</sub> N  | 0.20        | 18  | 14.818        | C <sub>5</sub> H <sub>8</sub> N <sub>2</sub> O <sub>2</sub>  | 5.53        |
| 8   | 4.614         | C <sub>7</sub> H <sub>8</sub>    | 2.02        | 19  | 16.074        | C <sub>14</sub> H <sub>28</sub> O <sub>2</sub>               | 1.10        |
| 9   | 6.07          | C <sub>7</sub> H <sub>13</sub> N | 0.43        | 20  | 16.978        | C <sub>11</sub> H <sub>12</sub> FNO                          | 0.81        |
| 10  | 8.248         | C <sub>6</sub> H <sub>6</sub> O  | 5.18        | 21  | 17.575        | C <sub>16</sub> H <sub>32</sub> O <sub>2</sub>               | 2.06        |
| 11  | 9.489         | C <sub>7</sub> H <sub>8</sub> O  | 9.17        | 22  | 18.81         | C <sub>18</sub> H <sub>34</sub> O <sub>2</sub>               | 2.79        |

**Table S4.** The pyrolysis gas chromatography of Si-B.

| No. | Time<br>(min) | Compound<br>Name                              | Area<br>(%) | No. | Time<br>(min) | Compound<br>Name                                             | Area<br>(%) |
|-----|---------------|-----------------------------------------------|-------------|-----|---------------|--------------------------------------------------------------|-------------|
| 1   | 1.645         | CO <sub>2</sub>                               | 33.31       | 16  | 10.415        | C <sub>6</sub> H <sub>11</sub> ClO <sub>2</sub>              | 0.52        |
| 2   | 1.913         | C <sub>2</sub> H <sub>3</sub> N               | 14.97       | 17  | 10.692        | C <sub>4</sub> H <sub>4</sub> N <sub>2</sub> O <sub>2</sub>  | 3.37        |
| 3   | 2.27          | C <sub>3</sub> H <sub>5</sub> N               | 0.39        | 18  | 11.266        | C <sub>8</sub> H <sub>8</sub> O                              | 0.80        |
| 4   | 2.603         | C <sub>4</sub> H <sub>7</sub> N               | 0.24        | 19  | 11.968        | C <sub>7</sub> H <sub>13</sub> NO <sub>2</sub>               | 1.15        |
| 5   | 3.88          | C <sub>5</sub> H <sub>9</sub> N               | 0.15        | 20  | 12.054        | C <sub>8</sub> H <sub>7</sub> N                              | 1.06        |
| 6   | 3.982         | C <sub>5</sub> H <sub>9</sub> N               | 0.13        | 21  | 12.728        | C <sub>9</sub> H <sub>13</sub> N <sub>3</sub> O <sub>4</sub> | 3.03        |
| 7   | 4.625         | C <sub>7</sub> H <sub>8</sub>                 | 1.62        | 22  | 13.046        | C <sub>7</sub> H <sub>10</sub> N <sub>2</sub> O              | 1.54        |
| 8   | 5.93          | C <sub>5</sub> H <sub>7</sub> N               | 0.46        | 23  | 13.729        | C <sub>6</sub> H <sub>10</sub> N <sub>2</sub> O <sub>2</sub> | 0.81        |
| 9   | 6.062         | C <sub>7</sub> H <sub>13</sub> N              | 0.78        | 24  | 14.446        | C <sub>12</sub> H <sub>24</sub> O <sub>2</sub>               | 0.39        |
| 10  | 6.763         | C <sub>8</sub> H <sub>8</sub>                 | 0.23        | 25  | 14.892        | C <sub>3</sub> H <sub>6</sub> N <sub>6</sub>                 | 19.61       |
| 11  | 7.32          | C <sub>6</sub> H <sub>9</sub> N               | 0.35        | 26  | 16.983        | C <sub>12</sub> H <sub>24</sub> BN                           | 0.87        |
| 12  | 8.248         | C <sub>6</sub> H <sub>6</sub> O               | 2.49        | 27  | 17.582        | C <sub>16</sub> H <sub>32</sub> O <sub>2</sub>               | 1.52        |
| 13  | 8.531         | C <sub>9</sub> H <sub>14</sub> N <sub>2</sub> | 0.09        | 28  | 18.816        | C <sub>18</sub> H <sub>34</sub> O <sub>2</sub>               | 1.85        |
| 14  | 8.659         | C <sub>7</sub> H <sub>11</sub> N              | 0.19        | 29  | 21.408        | C <sub>18</sub> H <sub>33</sub> N                            | 0.41        |
| 15  | 9.469         | C <sub>7</sub> H <sub>8</sub> O               | 7.67        |     |               |                                                              |             |

**Table S5.**The pyrolysis gas chromatography of Si-N<sub>1</sub>.

| No. | Time<br>(min) | Compound<br>Name                 | Area<br>(%) | No. | Time<br>(min) | Compound<br>Name                                             | Area (%) |
|-----|---------------|----------------------------------|-------------|-----|---------------|--------------------------------------------------------------|----------|
| 1   | 1.628         | CO <sub>2</sub>                  | 29.65       | 11  | 10.637        | C <sub>4</sub> H <sub>4</sub> N <sub>2</sub> O <sub>2</sub>  | 4.93     |
| 2   | 1.682         | CHN                              | 14.64       | 12  | 11.937        | C <sub>6</sub> H <sub>11</sub> NO <sub>4</sub>               | 1.45     |
| 3   | 1.9           | C <sub>2</sub> H <sub>3</sub> N  | 11.90       | 13  | 12.064        | C <sub>8</sub> H <sub>7</sub> N                              | 1.39     |
| 4   | 2.13          | C <sub>4</sub> H <sub>8</sub> O  | 0.37        | 14  | 12.661        | C <sub>9</sub> H <sub>13</sub> N <sub>3</sub> O <sub>4</sub> | 3.65     |
| 5   | 2.262         | C <sub>3</sub> H <sub>5</sub> N  | 0.73        | 15  | 13.026        | C <sub>8</sub> H <sub>10</sub> O <sub>2</sub>                | 1.79     |
| 6   | 2.593         | C <sub>4</sub> H <sub>7</sub> N  | 0.27        | 16  | 14.753        | C <sub>5</sub> H <sub>8</sub> N <sub>2</sub> O <sub>2</sub>  | 7.29     |
| 7   | 4.614         | C <sub>7</sub> H <sub>8</sub>    | 2.40        | 17  | 16.967        | C <sub>8</sub> H <sub>11</sub> N <sub>5</sub> O              | 1.33     |
| 8   | 6.017         | C <sub>7</sub> H <sub>13</sub> N | 0.61        | 18  | 17.566        | C <sub>16</sub> H <sub>32</sub> O <sub>2</sub>               | 0.56     |
| 9   | 8.289         | C <sub>6</sub> H <sub>6</sub> O  | 2.86        | 19  | 18.804        | C <sub>18</sub> H <sub>34</sub> O <sub>2</sub>               | 1.09     |
| 10  | 9.478         | C <sub>7</sub> H <sub>8</sub> O  | 13.09       |     |               |                                                              |          |

**Table S6.**The pyrolysis gas chromatography of Si-N<sub>2</sub>.

| No. | Time<br>(min) | Compound<br>Name                              | Area<br>(%) | No. | Time<br>(min) | Compound<br>Name                                            | Area<br>(%) |
|-----|---------------|-----------------------------------------------|-------------|-----|---------------|-------------------------------------------------------------|-------------|
| 1   | 1.641         | CO <sub>2</sub>                               | 35.28       | 19  | 10.434        | C <sub>5</sub> H <sub>7</sub> NO <sub>2</sub>               | 1.00        |
| 2   | 1.908         | C <sub>2</sub> H <sub>3</sub> N               | 3.67        | 20  | 10.782        | C <sub>4</sub> H <sub>4</sub> N <sub>2</sub> O <sub>2</sub> | 7.99        |
| 3   | 2.265         | C <sub>3</sub> H <sub>5</sub> N               | 1.20        | 21  | 11.287        | C <sub>8</sub> H <sub>8</sub> O                             | 1.42        |
| 4   | 2.597         | C <sub>4</sub> H <sub>7</sub> N               | 0.35        | 22  | 11.424        | C <sub>8</sub> H <sub>20</sub> BN                           | 0.60        |
| 5   | 3.877         | C <sub>5</sub> H <sub>9</sub> N               | 0.16        | 23  | 12.008        | C <sub>11</sub> H <sub>22</sub> N <sub>2</sub>              | 1.77        |
| 6   | 3.979         | C <sub>5</sub> H <sub>9</sub> N               | 0.21        | 24  | 12.05         | C <sub>8</sub> H <sub>7</sub> N                             | 1.37        |
| 7   | 4.47          | C <sub>4</sub> H <sub>5</sub> N               | 0.27        | 25  | 12.772        | C <sub>6</sub> H <sub>14</sub> N <sub>2</sub>               | 3.89        |
| 8   | 4.622         | C <sub>7</sub> H <sub>8</sub>                 | 1.87        | 26  | 12.922        | C <sub>12</sub> H <sub>10</sub>                             | 0.47        |
| 9   | 5.924         | C <sub>5</sub> H <sub>7</sub> N               | 0.82        | 27  | 13.003        | C <sub>9</sub> H <sub>9</sub> N                             | 0.51        |
| 10  | 6.058         | C <sub>7</sub> H <sub>13</sub> N              | 1.09        | 28  | 13.073        | C <sub>7</sub> H <sub>10</sub> N <sub>2</sub> O             | 1.29        |
| 11  | 6.765         | C <sub>8</sub> H <sub>8</sub>                 | 0.21        | 29  | 13.745        | C <sub>8</sub> H <sub>17</sub> NO                           | 1.52        |
| 12  | 7.315         | C <sub>6</sub> H <sub>9</sub> N               | 0.99        | 30  | 13.998        | C <sub>8</sub> H <sub>7</sub> NO                            | 0.83        |
| 13  | 7.503         | C <sub>6</sub> H <sub>9</sub> N               | 0.16        | 31  | 14.287        | C <sub>12</sub> H <sub>10</sub> O                           | 1.03        |
| 14  | 8.243         | C <sub>6</sub> H <sub>6</sub> O               | 2.23        | 32  | 14.994        | C <sub>5</sub> H <sub>8</sub> N <sub>2</sub> O <sub>2</sub> | 8.44        |
| 15  | 8.527         | C <sub>9</sub> H <sub>14</sub> N <sub>2</sub> | 0.15        | 33  | 17.003        | C <sub>8</sub> H <sub>11</sub> N <sub>5</sub> O             | 1.39        |
| 16  | 8.657         | C <sub>7</sub> H <sub>11</sub> N              | 0.26        | 34  | 17.464        | C <sub>9</sub> H <sub>14</sub> O <sub>2</sub>               | 0.94        |
| 17  | 9.468         | C <sub>7</sub> H <sub>8</sub> O               | 13.03       | 35  | 17.586        | C <sub>16</sub> H <sub>32</sub> O <sub>2</sub>              | 1.56        |
| 18  | 10.041        | C <sub>6</sub> H <sub>8</sub> O <sub>2</sub>  | 0.74        | 36  | 18.816        | C <sub>18</sub> H <sub>34</sub> O <sub>2</sub>              | 1.29        |



**Table S7.** The pyrolysis gas chromatography of Si-N<sub>3</sub>.

| No. | Time<br>(min) | Compound<br>Name                                            | Area<br>(%) | No. | Time<br>(min) | Compound<br>Name                                             | Area (%) |
|-----|---------------|-------------------------------------------------------------|-------------|-----|---------------|--------------------------------------------------------------|----------|
| 1   | 1.621         | CO <sub>2</sub>                                             | 38.21       | 14  | 11.295        | C <sub>8</sub> H <sub>8</sub> O                              | 0.75     |
| 2   | 1.889         | C <sub>2</sub> H <sub>3</sub> N                             | 15.02       | 15  | 11.97         | C <sub>7</sub> H <sub>13</sub> NO <sub>2</sub>               | 1.55     |
| 3   | 2.127         | C <sub>4</sub> H <sub>8</sub> O                             | 0.97        | 16  | 12.055        | C <sub>8</sub> H <sub>7</sub> N                              | 1.11     |
| 4   | 2.248         | C <sub>3</sub> H <sub>5</sub> N                             | 0.92        | 17  | 12.674        | C <sub>9</sub> H <sub>13</sub> N <sub>3</sub> O <sub>4</sub> | 4.84     |
| 5   | 4.61          | C <sub>7</sub> H <sub>8</sub>                               | 1.38        | 18  | 13.036        | C <sub>8</sub> H <sub>10</sub> O <sub>2</sub>                | 1.82     |
| 6   | 5.924         | C <sub>5</sub> H <sub>7</sub> N                             | 0.47        | 19  | 14.807        | C <sub>5</sub> H <sub>8</sub> N <sub>2</sub> O <sub>2</sub>  | 5.52     |
| 7   | 6.054         | C <sub>6</sub> H <sub>8</sub> O <sub>2</sub>                | 0.74        | 20  | 17.581        | C <sub>16</sub> H <sub>32</sub> O <sub>2</sub>               | 4.56     |
| 8   | 7.319         | C <sub>6</sub> H <sub>9</sub> N                             | 0.80        | 21  | 18.466        | C <sub>19</sub> H <sub>38</sub> O <sub>2</sub>               | 0.37     |
| 9   | 8.233         | C <sub>6</sub> H <sub>6</sub> O                             | 3.33        | 22  | 18.815        | C <sub>18</sub> H <sub>34</sub> O <sub>2</sub>               | 4.65     |
| 10  | 9.481         | C <sub>7</sub> H <sub>8</sub> O                             | 6.40        | 23  | 18.934        | C <sub>18</sub> H <sub>36</sub> O <sub>2</sub>               | 0.46     |
| 11  | 10.006        | C <sub>4</sub> H <sub>8</sub> N <sub>4</sub>                | 0.74        | 24  | 19.116        | C <sub>16</sub> H <sub>33</sub> NO                           | 0.58     |
| 12  | 10.407        | C <sub>7</sub> H <sub>10</sub> N <sub>2</sub>               | 0.46        | 25  | 20.403        | C <sub>18</sub> H <sub>35</sub> NO                           | 0.45     |
| 13  | 10.672        | C <sub>4</sub> H <sub>4</sub> N <sub>2</sub> O <sub>2</sub> | 3.90        |     |               |                                                              |          |

**Table S8.** The pyrolysis gas chromatography of Si-P1.

| No. | Time<br>(min) | Compound<br>Name                             | Area<br>(%) | No. | Time<br>(min) | Compound<br>Name                                            | Area<br>(%) |
|-----|---------------|----------------------------------------------|-------------|-----|---------------|-------------------------------------------------------------|-------------|
| 1   | 1.635         | CO <sub>2</sub>                              | 20.75       | 26  | 11.525        | C <sub>6</sub> H <sub>11</sub> NO                           | 0.75        |
| 2   | 1.687         | CHN                                          | 12.64       | 27  | 11.979        | C <sub>11</sub> H <sub>22</sub> N <sub>2</sub>              | 0.63        |
| 3   | 1.902         | C <sub>2</sub> H <sub>3</sub> N              | 9.94        | 28  | 12.049        | C <sub>8</sub> H <sub>7</sub> N                             | 1.22        |
| 4   | 2.138         | C <sub>4</sub> H <sub>8</sub> O              | 0.56        | 29  | 12.18         | C <sub>9</sub> H <sub>16</sub> O                            | 0.25        |
| 5   | 2.259         | C <sub>3</sub> H <sub>5</sub> N              | 1.55        | 30  | 12.25         | C <sub>10</sub> H <sub>16</sub> O                           | 0.34        |
| 6   | 2.538         | C <sub>2</sub> H <sub>4</sub> O <sub>2</sub> | 0.21        | 31  | 12.437        | C <sub>6</sub> H <sub>9</sub> N <sub>3</sub> O              | 0.43        |
| 7   | 2.593         | C <sub>4</sub> H <sub>7</sub> N              | 0.20        | 32  | 13.06         | C <sub>8</sub> H <sub>10</sub> O <sub>2</sub>               | 2.02        |
| 8   | 3.006         | C <sub>5</sub> H <sub>10</sub> O             | 0.14        | 33  | 15.241        | C <sub>5</sub> H <sub>8</sub> N <sub>2</sub> O <sub>2</sub> | 16.50       |
| 9   | 3.127         | C <sub>4</sub> H <sub>7</sub> N              | 0.33        | 34  | 15.74         | C <sub>16</sub> H <sub>29</sub> NO <sub>4</sub>             | 0.91        |
| 10  | 3.873         | C <sub>5</sub> H <sub>9</sub> N              | 0.16        | 35  | 16.094        | C <sub>14</sub> H <sub>28</sub> O <sub>2</sub>              | 0.32        |
| 11  | 3.974         | C <sub>5</sub> H <sub>9</sub> N              | 0.22        | 36  | 17.015        | C <sub>8</sub> H <sub>11</sub> N <sub>5</sub> O             | 3.14        |
| 12  | 4.629         | C <sub>7</sub> H <sub>8</sub>                | 2.33        | 37  | 17.17         | C <sub>16</sub> H <sub>31</sub> N                           | 0.45        |
| 13  | 5.563         | C <sub>7</sub> H <sub>11</sub> NO            | 0.11        | 38  | 17.225        | C <sub>8</sub> H <sub>13</sub> N <sub>7</sub>               | 1.50        |
| 14  | 5.922         | C <sub>5</sub> H <sub>7</sub> N              | 0.50        | 39  | 17.53         | C <sub>8</sub> H <sub>13</sub> N <sub>7</sub>               | 0.38        |
| 15  | 6.066         | C <sub>7</sub> H <sub>13</sub> N             | 0.44        | 40  | 17.604        | C <sub>16</sub> H <sub>32</sub> O <sub>2</sub>              | 4.11        |
| 16  | 7.316         | C <sub>6</sub> H <sub>9</sub> N              | 0.68        | 41  | 17.711        | C <sub>14</sub> H <sub>23</sub> NO                          | 0.70        |
| 17  | 7.501         | C <sub>6</sub> H <sub>9</sub> N              | 0.16        | 42  | 17.787        | C <sub>18</sub> H <sub>36</sub> O <sub>2</sub>              | 0.15        |
| 18  | 8.221         | C <sub>6</sub> H <sub>6</sub> O              | 3.23        | 43  | 18.47         | C <sub>18</sub> H <sub>33</sub> N                           | 0.41        |

|    |        |                                                |      |    |        |                                                |      |
|----|--------|------------------------------------------------|------|----|--------|------------------------------------------------|------|
| 19 | 8.526  | C <sub>7</sub> H <sub>11</sub> N               | 0.22 | 44 | 18.584 | C <sub>17</sub> H <sub>37</sub> N              | 0.27 |
| 20 | 8.655  | C <sub>7</sub> H <sub>11</sub> N               | 0.28 | 45 | 18.829 | C <sub>18</sub> H <sub>34</sub> O <sub>2</sub> | 4.53 |
| 21 | 9.482  | C <sub>7</sub> H <sub>8</sub> O                | 2.84 | 46 | 18.945 | C <sub>18</sub> H <sub>36</sub> O <sub>2</sub> | 0.52 |
| 22 | 10.42  | C <sub>5</sub> H <sub>7</sub> NO <sub>2</sub>  | 0.51 | 47 | 18.987 | C <sub>20</sub> H <sub>38</sub> O <sub>2</sub> | 0.31 |
| 23 | 10.648 | C <sub>4</sub> H <sub>7</sub> N <sub>3</sub> O | 0.94 | 48 | 19.123 | C <sub>16</sub> H <sub>33</sub> NO             | 0.26 |
| 24 | 11.293 | C <sub>8</sub> H <sub>8</sub> O                | 0.44 | 49 | 21.407 | C <sub>18</sub> H <sub>33</sub> N              | 0.29 |
| 25 | 11.423 | C <sub>9</sub> H <sub>9</sub> N                | 0.23 |    |        |                                                |      |

**Table S9.** The pyrolysis gas chromatography of Si-P<sub>2</sub>.

| No. | Time<br>(min) | Compound<br>Name | Area<br>(%) | No. | Time<br>(min) | Compound<br>Name | Area<br>(%) |
|-----|---------------|------------------|-------------|-----|---------------|------------------|-------------|
|-----|---------------|------------------|-------------|-----|---------------|------------------|-------------|

|    |       |                                  |       |    |        |                                                                              |       |
|----|-------|----------------------------------|-------|----|--------|------------------------------------------------------------------------------|-------|
| 1  | 1.636 | CO <sub>2</sub>                  | 18.11 | 20 | 8.527  | C <sub>9</sub> H <sub>14</sub> N <sub>2</sub>                                | 0.17  |
| 2  | 1.703 | C <sub>4</sub> H <sub>10</sub>   | 5.03  | 21 | 8.656  | C <sub>7</sub> H <sub>11</sub> N                                             | 0.20  |
| 3  | 1.801 | C <sub>2</sub> H <sub>6</sub> O  | 0.97  | 22 | 9.227  | C <sub>7</sub> H <sub>8</sub> O                                              | 0.24  |
| 4  | 1.899 | C <sub>2</sub> H <sub>3</sub> N  | 3.63  | 23 | 9.468  | C <sub>7</sub> H <sub>8</sub> O                                              | 8.89  |
| 5  | 2.257 | C <sub>3</sub> H <sub>5</sub> N  | 0.58  | 24 | 10.089 | C <sub>7</sub> H <sub>12</sub> O <sub>2</sub>                                | 0.75  |
| 6  | 2.59  | C <sub>4</sub> H <sub>7</sub> N  | 0.28  | 25 | 10.862 | C <sub>6</sub> H <sub>12</sub> N <sub>2</sub>                                | 8.77  |
| 7  | 3.127 | C <sub>4</sub> H <sub>7</sub> N  | 0.11  | 26 | 11.28  | C <sub>8</sub> H <sub>8</sub> O                                              | 1.54  |
| 8  | 3.871 | C <sub>5</sub> H <sub>9</sub> N  | 0.15  | 27 | 12.056 | C <sub>8</sub> H <sub>7</sub> N                                              | 3.62  |
| 9  | 3.975 | C <sub>5</sub> H <sub>9</sub> N  | 0.15  | 28 | 12.266 | C <sub>13</sub> H <sub>10</sub> F <sub>6</sub> N <sub>2</sub> O <sub>7</sub> | 0.72  |
| 10 | 4.461 | C <sub>4</sub> H <sub>5</sub> N  | 0.23  | 29 | 12.926 | C <sub>12</sub> H <sub>10</sub>                                              | 3.81  |
| 11 | 4.62  | C <sub>7</sub> H <sub>8</sub>    | 1.71  | 30 | 13.112 | C <sub>8</sub> H <sub>10</sub> O <sub>2</sub>                                | 2.84  |
| 12 | 5.919 | C <sub>5</sub> H <sub>7</sub> N  | 0.76  | 31 | 14.289 | C <sub>12</sub> H <sub>10</sub> O                                            | 12.72 |
| 13 | 6.057 | C <sub>7</sub> H <sub>13</sub> N | 0.76  | 32 | 14.909 | C <sub>13</sub> H <sub>10</sub>                                              | 3.49  |
| 14 | 6.271 | C <sub>8</sub> H <sub>10</sub>   | 0.09  | 33 | 15.074 | C <sub>5</sub> H <sub>8</sub> N <sub>2</sub> O <sub>2</sub>                  | 2.95  |
| 15 | 6.762 | C <sub>8</sub> H <sub>8</sub>    | 0.22  | 34 | 17.028 | C <sub>8</sub> H <sub>11</sub> N <sub>5</sub> O                              | 0.94  |
| 16 | 7.311 | C <sub>6</sub> H <sub>9</sub> N  | 0.64  | 35 | 17.616 | C <sub>16</sub> H <sub>32</sub> O <sub>2</sub>                               | 3.03  |
| 17 | 7.362 | C <sub>6</sub> H <sub>9</sub> N  | 0.21  | 36 | 18.84  | C <sub>18</sub> H <sub>34</sub> O <sub>2</sub>                               | 3.03  |
| 18 | 7.501 | C <sub>6</sub> H <sub>9</sub> N  | 0.23  | 37 | 19.464 | C <sub>12</sub> H <sub>9</sub> O <sub>2</sub> P                              | 1.09  |
| 19 | 8.218 | C <sub>6</sub> H <sub>6</sub> O  | 3.83  | 38 | 19.75  | C <sub>12</sub> H <sub>9</sub> NO <sub>3</sub>                               | 3.51  |

**Table S10.** The main peaks description about FTIR spectra of all samples.

| <b>Figure 9</b> | <b>Main Peaks Description</b>                                                                                                                                                                                                                                                                                                                                                                                                                                               |
|-----------------|-----------------------------------------------------------------------------------------------------------------------------------------------------------------------------------------------------------------------------------------------------------------------------------------------------------------------------------------------------------------------------------------------------------------------------------------------------------------------------|
| All Samples     | <p>The telescopic vibration absorption peak near <math>2930\text{ cm}^{-1}</math> was -OH contained in silk fabric.</p> <p>The Vibration absorption peak near <math>1640\text{ cm}^{-1}</math>, <math>1500\text{ cm}^{-1}</math> and <math>1235\text{ cm}^{-1}</math> were amide I, the amide II and amide III in the silk fabric.</p> <p>The <math>3500\text{ cm}^{-1} \sim 3000\text{ cm}^{-1}</math> was a strong -NH- absorption peak in the silk fabric structure.</p> |
| A               | <p>The deformation and rocking vibration absorption peaks of Si-O-Si appeared at <math>430\text{ cm}^{-1}</math> and <math>547\text{ cm}^{-1}</math>, respectively.</p> <p>The asymmetric stretching vibration absorption peak of Si-O appeared at <math>1077\text{ cm}^{-1}</math>.</p> <p>This indicates that the silica sol has formed a Si-O-Si bonding structure on the surface of the fabric.</p>                                                                     |
| B               | <p>The deformation and rocking vibration absorption peaks of Si-O-Si appeared at <math>436\text{ cm}^{-1}</math> and <math>521\text{ cm}^{-1}</math>, respectively.</p> <p>The telescopic vibration absorption peak of B-O appeared at <math>1443\text{ cm}^{-1}</math></p>                                                                                                                                                                                                 |

---

The deformation and rocking vibration absorption peaks of Si-O-Si appeared at 432  $\text{cm}^{-1}$  and 547  $\text{cm}^{-1}$ , respectively.

- C The vibration absorption peak of C=N appeared at 2194  $\text{cm}^{-1}$  and 2149  $\text{cm}^{-1}$ , respectively.

The deformation and rocking vibration absorption peaks of Si-O-Si appeared at 475  $\text{cm}^{-1}$  and 573  $\text{cm}^{-1}$ , respectively.

- D The telescopic vibration absorption peak of Si-NH<sub>2</sub> appeared at 3241  $\text{cm}^{-1}$  and 3384  $\text{cm}^{-1}$ , respectively.

The deformation and rocking vibration absorption peaks of Si-O-Si appeared at 449  $\text{cm}^{-1}$  and 508  $\text{cm}^{-1}$ , respectively.

- E The vibration absorption peak of P-O appeared at 734  $\text{cm}^{-1}$ .

The deformation and rocking vibration absorption peaks of Si-O-Si appeared at 462  $\text{cm}^{-1}$  and 509  $\text{cm}^{-1}$ , respectively.

- F The vibration absorption peak of P-O appeared at 762  $\text{cm}^{-1}$  and 852  $\text{cm}^{-1}$ , respectively
-
